# Supplementary material
Source: PubMed Central journal article supplement (PMC10437102)
Supplement: NIHMS1912442-supplement-Supplemental_Digital_Content_1.pdf [file NIHMS1912442-supplement-Supplemental_Digital_Content_1.pdf]

## **Appendix 1. Study Sites and Personnel**

The members of the *Eunice Kennedy Shriver* National Institute of Child Health and Human Development Maternal-Fetal Medicine Units Network that participated in this study are as follows:

### **Clinical Centers:**

Main centers are listed below. Personnel at subsites have the subsite listed in brackets.

**University of Pittsburgh**, Pittsburgh, PA – Hyagriv Simhan, MD, Melissa Bickus, BS, Francesca Facco, MD

**University of Alabama at Birmingham**, Birmingham, AL – Alan Tita, MD, PhD, Janatha Grant, DNP, RN, FNP-BC, Brian Casey, MD, Stacy Harris, BSN, RN

**The Ohio State University**, Columbus, OH – Mona Prasad, DO, MPH, Anna Bartholomew, RN, BSN, CCRP, Maged Costantine, MD, Erin Nelson, MPH, Dawn Cline, BSN, Samantha Weigand, MD [Miami Valley Hospital], David McKenna, MD [Miami Valley Hospital], Esther K. Snow, BSN [Miami Valley Hospital], Kathleen Fennig, MSN [Miami Valley Hospital], Mounira Habli, MD, MS [Good Samaritan Hospital], Donna Lambers, MD [Good Samaritan Hospital], Marta McClellan, MSN [Good Samaritan Hospital], Crystal Daffner, BS [Good Samaritan Hospital]

**University of Utah Health Sciences Center**, Salt Lake City, UT – Torri Metz, MD, Amber Sowles, RN, BSN, Kim Hill, BSN, Michael Varner, MD, M. Sean Esplin, MD [Intermountain Medical Center], Valerie Morby, RN [McKay-Dee Hospital Center]

**Brown University**, Providence, RI – Brenna Hughes, MD, Donna Allard, ADN, RNC, Dwight J. Rouse, MD, Erika Werner, MD, Janet Rousseau, BSN, RN, Joyce Lee, BA, David Gardner, BSN, RN, Lisa Beati, BSN, RN

**Columbia University**, New York, NY – Ronald Wapner, MD, Cynthia Gyamfi-Bannerman, MD, MS, Sabine Bousleiman, MSN, MSPH, Vilmarie Carmona, CCRC, Brandy Firman, CRC, Matthew Hoffman, MD [Christiana Care], Ashley Vanneman [Christiana Care], Kristy Palmores, MD [St. Peter's University Hospital], Imene Beche, CCRP [St. Peter's University Hospital]

**University of Texas Medical Branch**, Galveston, TX – George Saade, MD, Ashley Salazar, RN, MSN, WHNP, Luis Pacheco, MD, Janak Patel, MD, Amelia Nounes, BSN, Antonio Saad, MD, Sangeeta Jain, MD, Hassan Harirah, MD, Shannon Clark, MD, Gayle Olson, MD

**MetroHealth Medical Center-Case Western Reserve University**, Cleveland, OH – Edward Chien, MD, Wendy Dalton, RN, LuAnn Polito RN, JD, Cynthia Milluzi, RN, Kathleen Kushner, RN, David Hackney, MD [University Hospital], Ashley Maile [University Hospital], Jodi Bell

**University of Texas Health Science Center at Houston-Children's Memorial Hermann Hospital**, Houston, TX – Baha J. Sibai, MD, Suneet P. Chauhan, MD, Felecia Ortiz, RN, BSN

Prasad M, Saade GR, Clifton RG, Sandoval GJ, Hughes BL, Reddy UM, et al. Risk factors for perinatal transmission of hepatitis C virus. *Obstet Gynecol* 2023;142.

The authors provided this information as a supplement to their article.

©2023 American College of Obstetricians and Gynecologists.

**University of North Carolina at Chapel Hill**, Chapel Hill, NC – John Thorp, Jr., MD, Kelly Clark, BSN, RN, Sally Timlin, MSN, RN, Carmen Beamon, MD, MPH [WakeMed Health & Hospitals], Hannah Nunn, BA, Kacey Eichelberger, MD, Allison Moore, RN

**Northwestern University**, Chicago, IL – William Grobman, MD, MBA, Gail Mallett, RN, MS, Mercedes Ramos-Brinson, BS, Mara Dinsmoor, MD, MPH [NorthShore University Health System], Kristin Paychek, RN, BSN [NorthShore University Health System]

**University of Pennsylvania**, Philadelphia, PA – Samuel Parry, MD, Christina Pizzi, RN, Jennifer Craig, RN

**Duke University**, Durham, NC – Geety Swamy, MD, Tammy Bishop, RN, MSN, Jennifer Ferrara, RN, BSN

**University of Texas Southwestern Medical Center**, Dallas, TX – Brian Casey, MD, Lisa Moseley, RN, Tiffany Thomas, RN, Jordan Gerald, RN, Lisa Fay-Randall, RN, Ana Sias, CMA, Marcia Garcia

**Stanford University**, Stanford, CA – Yasser El-Sayed, MD, Christine Lee, RN, Natali Aziz, RN, Deirdre Lyell, MD, Anna Girsén, PhD

**University of Colorado**, Denver, CO – Kent Heyborne, MD, Jocelyn Phipers, BSN, CCRP, Kathy Hale, BSN

**Boston Medical Center**, Boston, MA – Vishakha Sabharwal, MD, Deb McLaughlin, RN, Stephen I. Pelton, MD

**University of Florida Health Science Center**, Jacksonville, FL – Mobeén Rathore, MD

**San Juan Hospital**, San Juan, Puerto Rico – Rodrigo Diaz-Velasco, MD, Elvia Perez-Hernandez, BS, MEd, MA, MPH, Midnela Acevedo-Flores, MD, MT, Wanda I. Marrero-Figueroa, BSN, RN

**Children’s Diagnostic and Treatment Center, Broward Health**, Ft. Lauderdale, FL – Ana M. Puga, MD, Dayana Leon, RN

**Jacobi Medical Center**, South Bronx, NY – Andrew Wiznia, MD

**University of Southern California Medical Center**, Los Angeles, CA – Andrea Kovacs, MD

**SUNY Stony Brook**, Stony Brook, NY – David J. Garry, MD, Sharon Nachman, MD

**Data Coordinating Center:**

**The George Washington University Biostatistics Center**, Washington, DC – Rebecca Clifton, PhD, Grecio Sandoval, PhD, Elizabeth A. Thom, PhD\*, Lis Mele, MS, Lynda G. Ugwu, PhD, V. Lynn Flowers-Fanomezantsoa, MSHS, Cindy Kwan

Prasad M, Saade GR, Clifton RG, Sandoval GJ, Hughes BL, Reddy UM, et al. Risk factors for perinatal transmission of hepatitis C virus. *Obstet Gynecol* 2023;142.

The authors provided this information as a supplement to their article.

©2023 American College of Obstetricians and Gynecologists.

**NIH:**

***Eunice Kennedy Shriver* National Institute of Child Health and Human Development,**  
Bethesda, MD – Susan Tolivaisa, Uma Reddy, MD, Monica Longo, MD, Menachem Miodovnik,  
MD, Stephanie Archer, MA

**MFMU Network Steering Committee Chair:** George A. Macones

Prasad M, Saade GR, Clifton RG, Sandoval GJ, Hughes BL, Reddy UM, et al. Risk factors for perinatal transmission of hepatitis C virus. *Obstet Gynecol* 2023;142.

The authors provided this information as a supplement to their article.

©2023 American College of Obstetricians and Gynecologists.
